# Supplementary material for: Patient-Assessed Chronic Illness Care (PACIC) scenario in an Indian homeopathic hospital
Source: PubMed Central journal article supplement — J Tradit Complement Med. 2015 Jan 7;6(1):72–7. doi: 10.1016/j.jtcme.2014.11.020 (PMC4765762; doi:10.1016/j.jtcme.2014.11.020), 2015-01-07
Supplement: mmc1.pdf [file mmc1.pdf]

# রোগী স্ব-নির্ধারিত দুরারোগ্য ব্যাধির যত্ন ও চিকিৎসা সংক্রান্ত প্রশ্নাবলী – ২০

[ নির্দেশাবলী : অনুগ্রহ করিয়া সঠিক স্থানে টিক্ (✓) চিহ্ন দিন। ]

| বিষয়                                                                                                                                   | পরিমাপ                                         |                                            |                                    |                                            |                                                |
|-----------------------------------------------------------------------------------------------------------------------------------------|------------------------------------------------|--------------------------------------------|------------------------------------|--------------------------------------------|------------------------------------------------|
| ১) চিকিৎসা প্রণালীতে আমার মতামত নেওয়া হয়।                                                                                             | <input type="checkbox"/><br>প্রায়<br>কখনই নয় | <input type="checkbox"/><br>সাধারণত<br>নয় | <input type="checkbox"/><br>মঝেমঝে | <input type="checkbox"/><br>প্রায়<br>সময় | <input type="checkbox"/><br>প্রায় সকল<br>সময় |
| ২) উপযুক্ত চিকিৎসা পদ্ধতি বেছে নেওয়ার সুযোগ থাকে।                                                                                      | <input type="checkbox"/><br>প্রায়<br>কখনই নয় | <input type="checkbox"/><br>সাধারণত<br>নয় | <input type="checkbox"/><br>মঝেমঝে | <input type="checkbox"/><br>প্রায়<br>সময় | <input type="checkbox"/><br>প্রায় সকল<br>সময় |
| ৩) ঔষধ বা তার প্রতিক্রিয়া সম্পর্কিত সমস্যা সম্পর্কে জিজ্ঞাসা করা হয়।                                                                  | <input type="checkbox"/><br>প্রায়<br>কখনই নয় | <input type="checkbox"/><br>সাধারণত<br>নয় | <input type="checkbox"/><br>মঝেমঝে | <input type="checkbox"/><br>প্রায়<br>সময় | <input type="checkbox"/><br>প্রায় সকল<br>সময় |
| ৪) আমার স্বাস্থ্যের উন্নতির জন্য প্রয়োজনীয় তথ্যের একটি লিখিত তালিকা দেওয়া হয়।                                                       | <input type="checkbox"/><br>প্রায়<br>কখনই নয় | <input type="checkbox"/><br>সাধারণত<br>নয় | <input type="checkbox"/><br>মঝেমঝে | <input type="checkbox"/><br>প্রায়<br>সময় | <input type="checkbox"/><br>প্রায় সকল<br>সময় |
| ৫) পরিকল্পিত চিকিৎসায় আমি সন্তুষ্ট।                                                                                                    | <input type="checkbox"/><br>প্রায়<br>কখনই নয় | <input type="checkbox"/><br>সাধারণত<br>নয় | <input type="checkbox"/><br>মঝেমঝে | <input type="checkbox"/><br>প্রায়<br>সময় | <input type="checkbox"/><br>প্রায় সকল<br>সময় |
| ৬) রোগ নিয়ন্ত্রণের উদ্দেশ্যে আমি যা পদ্ধতি অবলম্বন করি তা আমার রোগের উপর কি প্রভাব ফেলে, ডাক্তারবাবু আমার সঙ্গে বিস্তারিত আলোচনা করেন। | <input type="checkbox"/><br>প্রায়<br>কখনই নয় | <input type="checkbox"/><br>সাধারণত<br>নয় | <input type="checkbox"/><br>মঝেমঝে | <input type="checkbox"/><br>প্রায়<br>সময় | <input type="checkbox"/><br>প্রায় সকল<br>সময় |
| ৭) স্বাস্থ্যের যত্ন নেওয়াতে আমার লক্ষ্য কি হওয়া উচিত, ডাক্তারবাবু তা নিয়ে আমার সঙ্গে নিয়মিত আলোচনা করেন।                            | <input type="checkbox"/><br>প্রায়<br>কখনই নয় | <input type="checkbox"/><br>সাধারণত<br>নয় | <input type="checkbox"/><br>মঝেমঝে | <input type="checkbox"/><br>প্রায়<br>সময় | <input type="checkbox"/><br>প্রায় সকল<br>সময় |
| ৮) আমার পথ্য ও ব্যায়াম পদ্ধতি নির্দিষ্ট লক্ষ্যে পৌঁছতে আমাকে সাহায্য করে।                                                              | <input type="checkbox"/><br>প্রায়<br>কখনই নয় | <input type="checkbox"/><br>সাধারণত<br>নয় | <input type="checkbox"/><br>মঝেমঝে | <input type="checkbox"/><br>প্রায়<br>সময় | <input type="checkbox"/><br>প্রায় সকল<br>সময় |
| ৯) আমার চিকিৎসা পরিকল্পনার একটি লিখিত পত্র দেওয়া হয়।                                                                                  | <input type="checkbox"/><br>প্রায়<br>কখনই নয় | <input type="checkbox"/><br>সাধারণত<br>নয় | <input type="checkbox"/><br>মঝেমঝে | <input type="checkbox"/><br>প্রায়<br>সময় | <input type="checkbox"/><br>প্রায় সকল<br>সময় |
| ১০) আমার রোগের সঙ্গে মানিয়ে নেওয়ার সুবিধার্থে ডাক্তারবাবু আমাকে বিশেষ ধরনের ক্লাসে যোগ দিতে উৎসাহ দেন।                                | <input type="checkbox"/><br>প্রায়<br>কখনই নয় | <input type="checkbox"/><br>সাধারণত<br>নয় | <input type="checkbox"/><br>মঝেমঝে | <input type="checkbox"/><br>প্রায়<br>সময় | <input type="checkbox"/><br>প্রায় সকল<br>সময় |

# রোগী স্ব-নির্ধারিত দুরারোগ্য ব্যাধির যত্ন ও চিকিৎসা সংক্রান্ত প্রশ্নাবলী – ২০

[ নির্দেশাবলী : অনুগ্রহ করিয়া সঠিক স্থানে টিক্ (✓) চিহ্ন দিন। ]

| বিষয়                                                                                                                                 | পরিমাপ                                         |                                            |                                    |                                            |                                                |
|---------------------------------------------------------------------------------------------------------------------------------------|------------------------------------------------|--------------------------------------------|------------------------------------|--------------------------------------------|------------------------------------------------|
| ১১) আমার স্বাস্থ্যভ্যাস জানতে আমাকে সরাসরি বা নিরীক্ষার মাধ্যমে প্রশ্ন করা হয়।                                                       | <input type="checkbox"/><br>প্রায়<br>কখনই নয় | <input type="checkbox"/><br>সাধারণত<br>নয় | <input type="checkbox"/><br>মঝেমঝে | <input type="checkbox"/><br>প্রায়<br>সময় | <input type="checkbox"/><br>প্রায় সকল<br>সময় |
| ১২) আমি নিশ্চিত যে আমার চিকিৎসার সময় ডাক্তারবাবু আমার মূল্যবোধ এবং সংস্কৃতির কথা মাথায় রাখেন।                                       | <input type="checkbox"/><br>প্রায়<br>কখনই নয় | <input type="checkbox"/><br>সাধারণত<br>নয় | <input type="checkbox"/><br>মঝেমঝে | <input type="checkbox"/><br>প্রায়<br>সময় | <input type="checkbox"/><br>প্রায় সকল<br>সময় |
| ১৩) আমার দৈনন্দিন জীবনে মেনে চলতে পারব, এরকম একটি চিকিৎসা পদ্ধতি তৈরীতে ডাক্তারবাবু আমাকে সাহায্য করেন।                               | <input type="checkbox"/><br>প্রায়<br>কখনই নয় | <input type="checkbox"/><br>সাধারণত<br>নয় | <input type="checkbox"/><br>মঝেমঝে | <input type="checkbox"/><br>প্রায়<br>সময় | <input type="checkbox"/><br>প্রায় সকল<br>সময় |
| ১৪) প্রতিকূল পরিস্থিতিতেও যাতে আমি আমার স্বাস্থ্যের যত্ন নিতে পারি, ডাক্তারবাবু এরকম পরিকল্পনা তৈরীতে আমাকে সাহায্য করেন।             | <input type="checkbox"/><br>প্রায়<br>কখনই নয় | <input type="checkbox"/><br>সাধারণত<br>নয় | <input type="checkbox"/><br>মঝেমঝে | <input type="checkbox"/><br>প্রায়<br>সময় | <input type="checkbox"/><br>প্রায় সকল<br>সময় |
| ১৫) আমার দুরারোগ্য ব্যাধি কিভাবে আমার জীবনকে প্রভাবিত করে সে সম্পর্কে ডাক্তারবাবু আমায় জিজ্ঞাসা করেন।                                | <input type="checkbox"/><br>প্রায়<br>কখনই নয় | <input type="checkbox"/><br>সাধারণত<br>নয় | <input type="checkbox"/><br>মঝেমঝে | <input type="checkbox"/><br>প্রায়<br>সময় | <input type="checkbox"/><br>প্রায় সকল<br>সময় |
| ১৬) প্রত্যেক সাক্ষাতের পর কিরকম আছি জানতে ডাক্তারবাবু যোগাযোগ রাখেন।                                                                  | <input type="checkbox"/><br>প্রায়<br>কখনই নয় | <input type="checkbox"/><br>সাধারণত<br>নয় | <input type="checkbox"/><br>মঝেমঝে | <input type="checkbox"/><br>প্রায়<br>সময় | <input type="checkbox"/><br>প্রায় সকল<br>সময় |
| ১৭) কোন সামাজিক অনুষ্ঠানে যোগ দেওয়ার জন্য ডাক্তারবাবু আমাকে উৎসাহিত করেন।                                                            | <input type="checkbox"/><br>প্রায়<br>কখনই নয় | <input type="checkbox"/><br>সাধারণত<br>নয় | <input type="checkbox"/><br>মঝেমঝে | <input type="checkbox"/><br>প্রায়<br>সময় | <input type="checkbox"/><br>প্রায় সকল<br>সময় |
| ১৮) ডাক্তারবাবু প্রয়োজনে আমাকে খাদ্য-বিশেষজ্ঞ (ডায়েটিশিয়ান), স্বাস্থ্য-বিশারদ বা স্বাস্থ্য-পরামর্শদাতার সঙ্গে যোগাযোগ করতে বলেন।   | <input type="checkbox"/><br>প্রায়<br>কখনই নয় | <input type="checkbox"/><br>সাধারণত<br>নয় | <input type="checkbox"/><br>মঝেমঝে | <input type="checkbox"/><br>প্রায়<br>সময় | <input type="checkbox"/><br>প্রায় সকল<br>সময় |
| ১৯) আমার স্বাস্থ্যের উন্নতির জন্য অন্য ডাক্তারবাবুদের সঙ্গে সাক্ষাৎকার কেমন চলছে তা জিজ্ঞাসা করেন।                                    | <input type="checkbox"/><br>প্রায়<br>কখনই নয় | <input type="checkbox"/><br>সাধারণত<br>নয় | <input type="checkbox"/><br>মঝেমঝে | <input type="checkbox"/><br>প্রায়<br>সময় | <input type="checkbox"/><br>প্রায় সকল<br>সময় |
| ২০) অন্য ডাক্তারবাবুদের সঙ্গে যোগাযোগ কিভাবে আমার চিকিৎসায় সাহায্য করতে পারে, ডাক্তারবাবু তা নিয়ে আমার সঙ্গে বিস্তারিত আলোচনা করেন। | <input type="checkbox"/><br>প্রায়<br>কখনই নয় | <input type="checkbox"/><br>সাধারণত<br>নয় | <input type="checkbox"/><br>মঝেমঝে | <input type="checkbox"/><br>প্রায়<br>সময় | <input type="checkbox"/><br>প্রায় সকল<br>সময় |
